# Supplementary material for: Breast cancer cell-derived exosomes and macrophage polarization are associated with lymph node metastasis
Source: PubMed Central journal article supplement (PMC5800911; doi:10.18632/oncotarget.23238), 2017-12-13
Supplement: oncotarget-09-7398-s001.pdf [file oncotarget-09-7398-s001.pdf]

## Breast cancer cell-derived exosomes and macrophage polarization are associated with lymph node metastasis

### SUPPLEMENTARY MATERIALS

**Supplementary Table 1: Specific primer sequence for real-time RT-PCR**

| Gene           |         | Sequence (5' -> 3')      |
|----------------|---------|--------------------------|
| NOS2           | Forward | CAGAGGACCCAGAGACAAGC     |
|                | Reverse | TGCTGAAACATTTTCCTGTGC    |
| Arginase-1     | Forward | GGAATCTGCATGGGCAACCTGTGT |
|                | Reverse | AGGGTCTACGTCTCGCAAGCCA   |
| CD206          | Forward | TTCGGTGGACTGTGGACGAGCA   |
|                | Reverse | ATAAGCCACCTGCCACTCCGGT   |
| FIZZ-1         | Forward | TCCAGTGAATACTGATGAGA     |
|                | Reverse | CCACTCTGGATCTCCCAAGA     |
| YM-1           | Forward | GGGCATACCTTTATCCTGAG     |
|                | Reverse | CCACTGAAGTCATCCATGTC     |
| $\beta$ -actin | Forward | TTCCTGGGCATGGAGTCCTGTGG  |
|                | Reverse | CGCCTAGAAGCATTTGCGGTGG   |

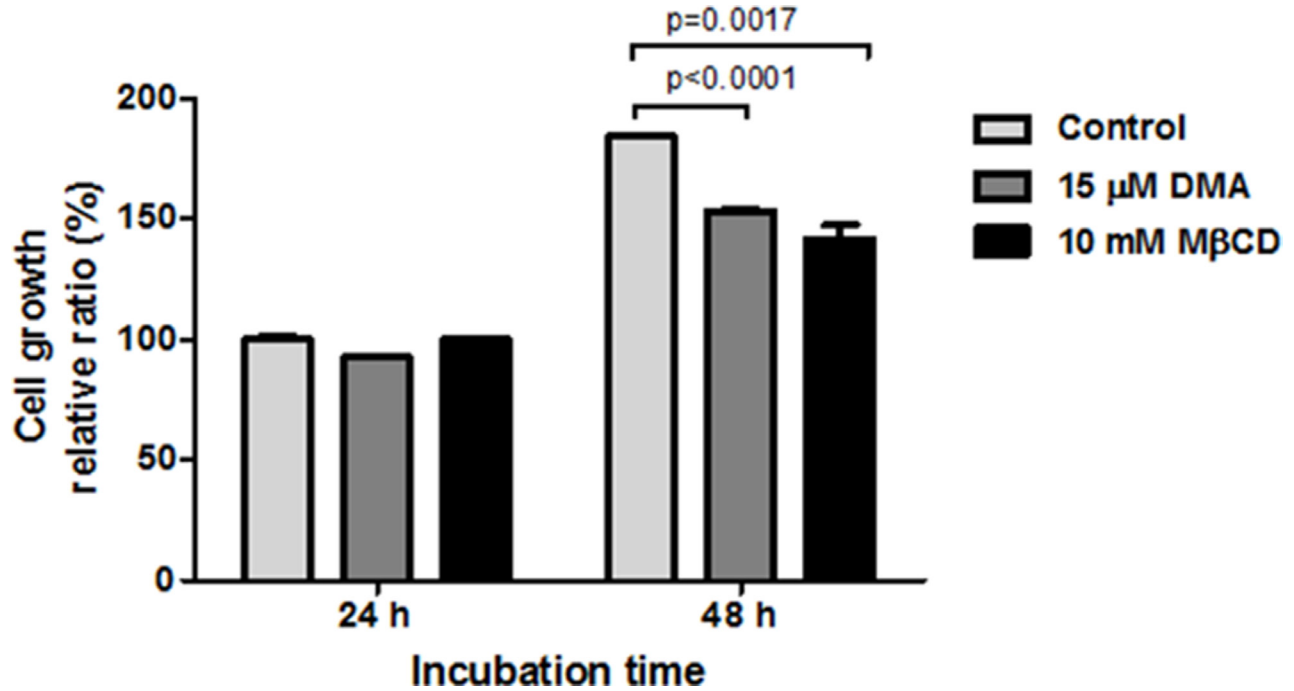

**Supplementary Figure 1: TNBC cell proliferation is suppressed by blocking exosome releasing and uptake.** Proliferation of MDA-MB-231 cells treated with exosome-releasing inhibitor 5-(N, N-dimethyl) amiloride hydrochloride (DMA, 15  $\mu$ M) or exosome-uptake inhibitor methyl- $\beta$ -cyclodextrin (M $\beta$ CD, 10 mM) for 24 to 48 hours was evaluated by MTT assay.

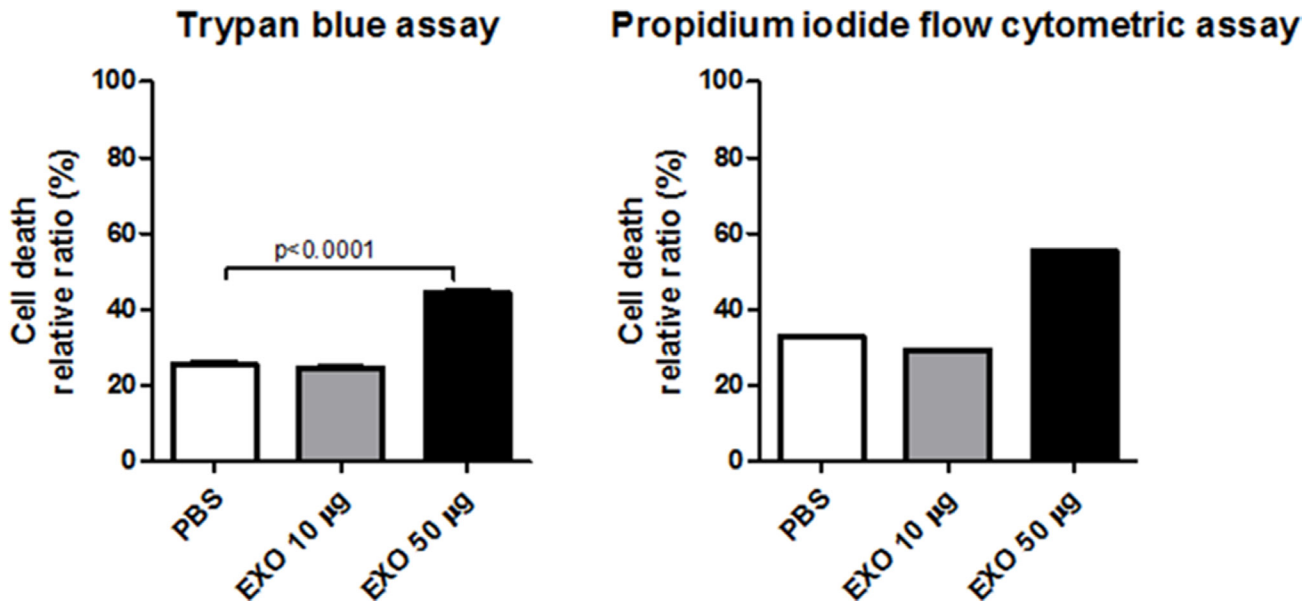

**Supplementary Figure 2: High concentration of cancer-derived exosomes leads to the cytotoxicity of RAW264.7 cells.** Cytotoxic effect in RAW264.7 cells treated with cancer exosomes (10 and 50  $\mu$ g/mL) for 24 to 48 hours was investigated by trypan blue and propidium iodide flow cytometric assays.

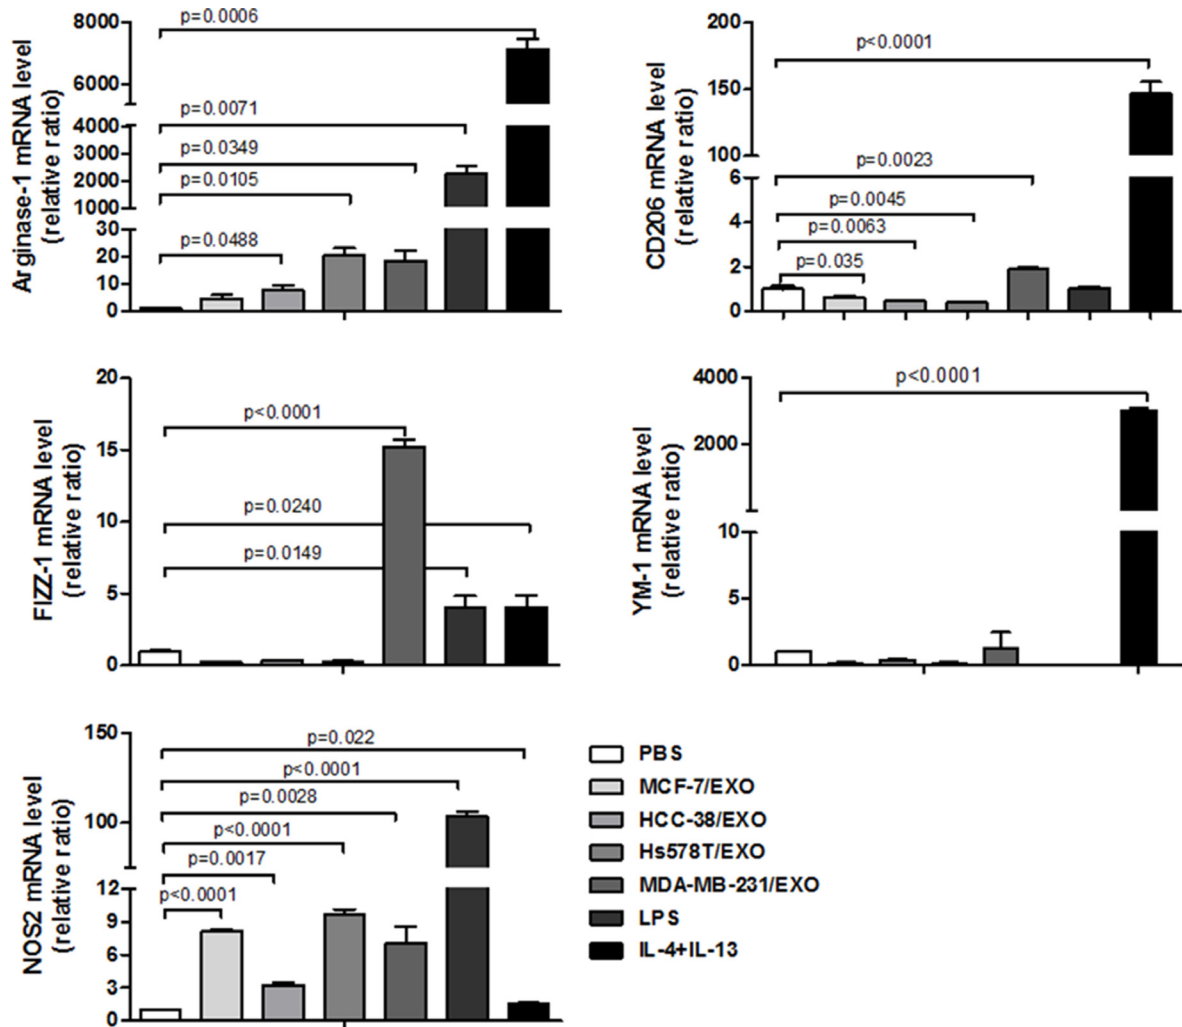

**Supplementary Figure 3: Investigation of M1/M2 polarization markers in RAW264.7 cells treated with different breast cancer exosomes.** Arginase-1, CD206, FIZZ-1, YM-1, and NOS2 expressions in RAW264.7 cells treated with 10  $\mu\text{g}/\text{mL}$  of diverse breast cancer-exosomes (MCF-7, HCC-38, Hs578T, and MDA-MB-231), LPS (100  $\text{ng}/\text{mL}$ ) for 24 to 48 hours, or a complex of IL-4/IL-13 (20  $\text{ng}/\text{mL}$ ) for 4 days were investigated by real-time RT-PCR.

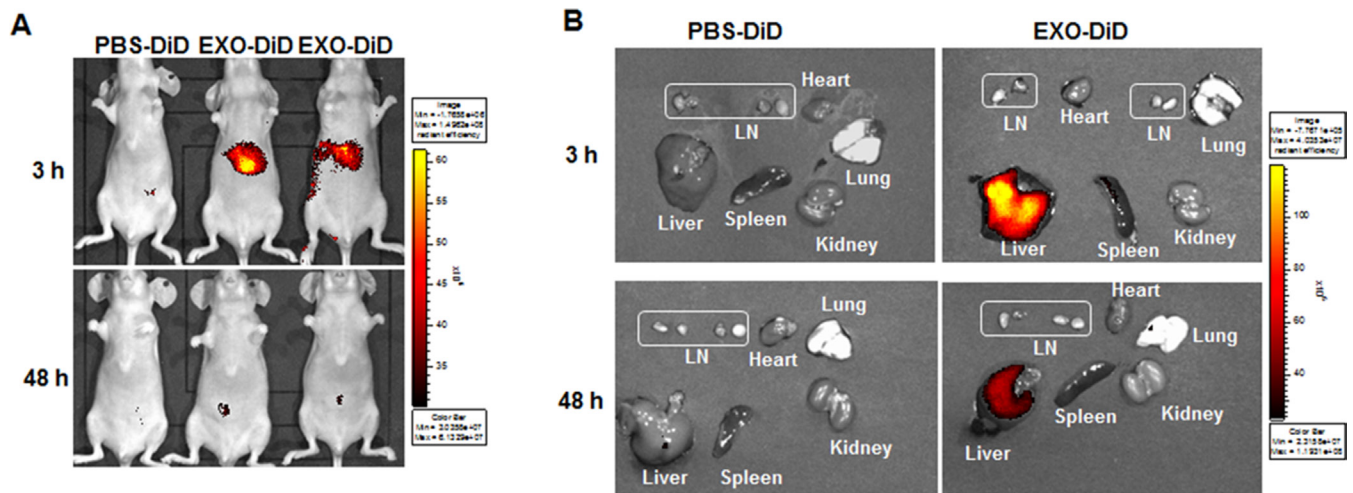

**Supplementary Figure 4: Biodistribution of TNBC cell-derived exosomes.** (A) Follow-up *in vivo* and *ex vivo* imaging of RFP-tagged exosomes (EXO) labeled with DiD in a mouse after intravenous injection. (B) *Ex vivo* imaging of RFP-tagged exosomes labeled with DiD in diverse tissues, including LN, heart, liver, spleen, lung, and kidney.

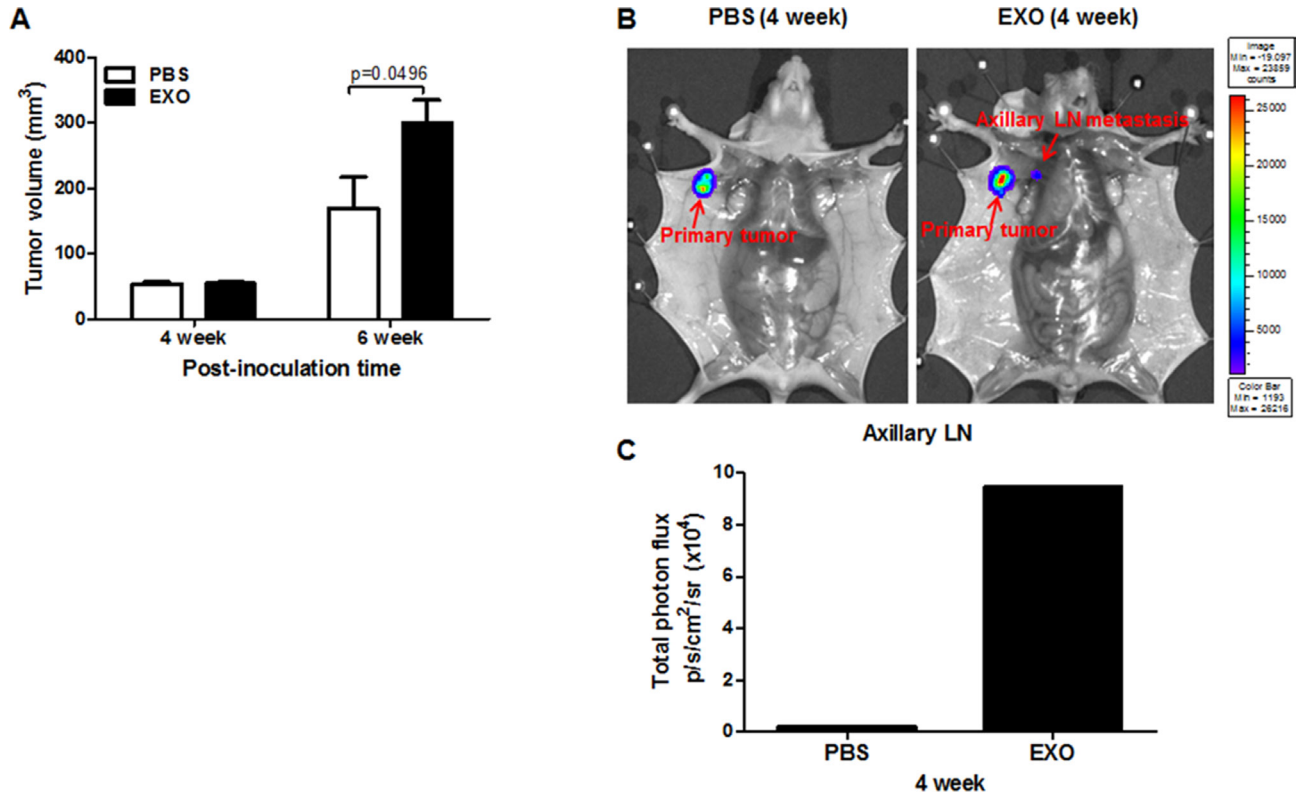

**Supplementary Figure 5: Early detection of axillary LNs metastasis in xenograft tumor mice intravenously injected with TNBC cell-derived exosomes.** (A) Xenograft tumor volume in mice administered with PBS-derived or TNBC cell-derived exosomes at 4 weeks and 6 weeks after the injection of TNBC cells. (B and C) Representative BLI and total photon flux (mean  $\pm$  S.E.) of axillary LN area in tumors from mice intravenously injected with PBS or exosomes at 4 weeks.
